# Supplementary material
Source: Research Square preprint supplement (doi:10.21203/rs.3.rs-9788437/v1)
Supplement: Supplementary file 1 [file 97dbff3536617c12e63b463a.docx]

## **Supplementary Files**

### **Supplementary Appendix S1: Complete Search Strategies**

#### **PubMed (searched May 10, 2025; re-run May 25, 2025)**

("gingival cleft"[Title/Abstract] OR "gingival invagination"[Title/Abstract])

Results: 18 records

#### **Google Scholar (searched May 10, 2025)**

("gingival cleft" OR "gingival invagination") AND orthodontic

Results: Approximately 400 records (top 200 screened per standard practice)

#### **OpenAlex (searched via API on May 10, 2025)**

title.abstract.search: "gingival cleft" OR title.abstract.search: "gingival invagination"

Filters: type:article OR review; language:en OR de

Results: 43 works

#### **CORE (searched via web interface on May 10, 2025)**

(gingival cleft OR gingival invagination) AND orthodontic

Results: 288 research outputs

#### **Hand search**

Reference lists of all included studies and relevant reviews (Gölz et al. 2011, Wang et al. 2018) were manually screened. No additional unique records were identified beyond database searches.
