# Supplementary material
Source: Research Square preprint supplement (doi:10.21203/rs.3.rs-9788437/v1)
Supplement: Supplementary file 2 [file a29ffb8af3ff0500df71d661.docx]

## **Supplementary Files**

### **Supplementary File 1: PRISMA-ScR Checklist**

| Section/topic | # | Checklist item | Reported on page # |
| --- | --- | --- | --- |
| **TITLE** |  |  |  |
| Title | 1 | Identify the report as a scoping review. | Page 1 |
| **ABSTRACT** |  |  |  |
| Structured summary | 2 | Provide structured summary including background, objectives, methods, results, conclusions. | Page 2 |
| **INTRODUCTION** |  |  |  |
| Rationale | 3 | Describe rationale for review in context of existing knowledge. | Pages 3-4 |
| Objectives | 4 | Provide explicit statement of questions being addressed. | Page 4 |
| **METHODS** |  |  |  |
| Protocol | 5 | Indicate whether protocol exists; if registered, provide details. | Page 5 (not registered, explained) |
| Eligibility criteria | 6 | Specify characteristics of included studies. | Page 6 |
| Information sources | 7 | Describe all databases, dates of coverage, and last search date. | Page 5 |
| Search strategy | 8 | Present full search strategy for at least one database. | Pages 5-6 + Appendix S1 |
| Selection process | 9 | State process for selecting sources. | Page 6 |
| Data extraction | 10 | Describe method of data extraction. | Page 6 |
| Data items | 11 | List all variables for which data were sought. | Page 6 |
| Critical appraisal | 12 | Describe methods for quality assessment. | Page 7 |
| Synthesis methods | 13 | Describe methods for data synthesis and meta-analysis. | Page 7 |
| **RESULTS** |  |  |  |
| Selection of sources | 14 | Give numbers of screened, assessed, and included studies. | Page 8 + Figure 1 |
| Characteristics of sources | 15 | Describe characteristics of included studies. | Pages 8-9 + Table 1 |
| Critical appraisal | 16 | Present quality assessment results. | Supplementary Table S1 |
| Synthesis results | 17 | Present main synthesis results, including meta-analysis. | Pages 9-12 |
| **DISCUSSION** |  |  |  |
| Summary of evidence | 18 | Summarize main findings, including limitations. | Pages 13-16 |
| Limitations | 19 | Discuss limitations of review process. | Page 16 |
| Conclusions | 20 | Interpret findings and implications. | Page 17 |
| **FUNDING** |  |  |  |
| Funding | 21 | Describe sources of funding. | Page 20 |
