# Supplementary material
Source: Research Square preprint supplement (doi:10.21203/rs.3.rs-9788437/v1)
Supplement: Supplementary file 3 [file bf44bcd19ca79049581189f3.xlsx]

## Sheet: Sheet1
Supplementary Table S1 (quality assessment)
#	Study (first author, year)	Design	Tool	Rating / Score	Notes
Systematic Reviews (n = 2)
1	Gölz L, 2011 [6]	Systematic review	AMSTAR‑2	Moderate	Comprehensive search; no meta‑analysis due to heterogeneity
2	Wang XY, 2018 [7]	Systematic review	AMSTAR‑2	Low	Chinese language; English abstract only used
Randomized Controlled Trials (n = 2)
3	Reichert C, 2017 [8]	RCT (multicenter)	RoB 2	Some concerns	Lack of blinding; small sample size
4	Moqadam AS (Fereydooni), 2016 [10]	RCT (pilot)	RoB 2	Some concerns	Pilot study; small sample; lack of blinding
Trial Protocol (n = 1)
5	Reichert C, 2013 [9]	Trial protocol	N/A	Not applicable	No outcome data reported; protocol only
Prospective Cohort Studies (n = 6)
6	Robertson PB, 1977 [1]	Retrospective cohort (incidence)	NOS	5/9	Moderate risk of bias; limited reporting
7	Rivera Circuns AL, 1983 [2]	Prospective cohort	NOS	6/9	Moderate risk of bias; adequate follow‑up
8	Wehrbein H, 1995 [4]	Prospective cohort (histologic)	NOS	6/9	Moderate risk of bias; small sample
9	Stappert D, 2018 [11]	Prospective cohort	NOS	7/9	Good quality; clear definition of cleft
10	Malkoc S, 2004 [14]	Prospective cohort (treatment)	NOS	5/9	Excluded from primary meta‑analysis; treatment‑enriched
11	Tiefengraber J, 2002 [15]	Pilot study (prospective)	NOS	4/9	Limited generalizability; small sample
Retrospective Cohort / Case‑Control Studies (n = 18)
12	Schultz LD, 1975 [3]	Letter (no original data)	N/A	Not assessed	Historical description only
13	Pinheiro ML, 2006 [5]	Case report	N/A	Not assessed	Included for treatment description only
14	Escobar Arregocés FM, 2020 [16]	Case series	NOS	4/9	Cleft lip/palate population; limited generalizability
15	Han M, 2024 [12]	Retrospective cohort	NOS	8/9	Good quality; large sample (n=135); clear risk factor analysis
16	Bressane L, 2021 [13]	Retrospective cohort	NOS	6/9	Moderate risk of bias
17	Zhao L, 2018	Retrospective cohort	NOS	5/9	Chinese; abstract only
18	Manfio ASC, 2023	Retrospective cohort	NOS	6/9	Cleft palate population; non‑cleft control present
19	De Almeida AL, 2010	Retrospective cohort	NOS	6/9	Cleft population; adequate control
20	Zhu S, 2013	Retrospective case‑control	NOS	7/9	Good quality; clear case definition
21	Celikoglu M, 2017	Retrospective cohort (CBCT)	NOS	7/9	Good quality; objective measurement
22	Lemberger M, 2024	Prospective cohort (long‑term)	NOS	7/9	Good quality; long follow‑up
23	Jabbari F, 2018	Retrospective cohort	NOS	6/9	Moderate risk of bias
24	Andlin‑Sobocki A, 1995	Retrospective cohort	NOS	6/9	Moderate risk of bias
25	Gaggl A, 1999	Retrospective cohort	NOS	5/9	Limited reporting
26	Quirynen M, 2003	Split‑mouth cohort	NOS	7/9	Good design
27	Hinrichs JE, 1984	Retrospective cohort	NOS	5/9	Older study; limited reporting
28	Teja Z, 1992	Retrospective cohort	NOS	5/9	Moderate risk of bias
29	Brägger U, 1985	Retrospective cohort	NOS	5/9	Moderate risk of bias
