# Supplementary material
Source: Research Square preprint supplement (doi:10.21203/rs.3.rs-9788437/v1)
Supplement: Supplementary file 3 [file f42cc0d445ab2c058c781748.docx]

## **Supplementary Files**

### **Supplementary File 2: PRISMA 2020 Checklist for Meta**‑**Analyses**

| Section/topic | # | Checklist item | Reported on page # |
| --- | --- | --- | --- |
| **TITLE** | 1 | Identify as systematic review/meta-analysis. | Page 1 |
| **ABSTRACT** | 2 | Structured summary. | Page 2 |
| **INTRODUCTION** |  |  |  |
| Rationale | 3 | Describe rationale. | Pages 3-4 |
| Objectives | 4 | Provide explicit objectives. | Page 4 |
| **METHODS** |  |  |  |
| Eligibility criteria | 5 | Specify inclusion/exclusion criteria. | Page 6 |
| Information sources | 6 | Describe databases and last search date. | Page 5 |
| Search strategy | 7 | Present full search strategy. | Pages 5-6 + Appendix S1 |
| Selection process | 8 | Describe selection process. | Page 6 |
| Data collection process | 9 | Describe data extraction method. | Page 6 |
| Data items | 10 | List all data items sought. | Page 6 |
| Study risk of bias | 11 | Describe quality assessment methods. | Page 7 |
| Effect measures | 12 | Specify effect measures (OR, incidence). | Page 7 |
| Synthesis methods | 13 | Describe meta-analysis methods. | Page 7 |
| Certainty assessment | 14 | Describe GRADE or equivalent. | Page 15 |
| **RESULTS** |  |  |  |
| Study selection | 15 | Numbers of studies screened, included. | Page 8 + Figure 1 |
| Study characteristics | 16 | Describe included studies. | Pages 8-9 + Table 1 |
| Risk of bias | 17 | Present quality assessment. | Supplementary Table S1 |
| Individual study results | 18 | Present results for each study. | Table 1, Figure 2 |
| Synthesis results | 19 | Present pooled estimates and heterogeneity. | Page 10 |
| Certainty of evidence | 20 | Present GRADE assessment. | Page 15 |
| **DISCUSSION** |  |  |  |
| Limitations | 22 | Discuss limitations. | Page 16 |
| Interpretation | 23 | Interpret results. | Pages 13-15 |
| **OTHER** |  |  |  |
| Registration | 24 | Registration info (none, explained). | Page 5 |
| Conflict of interest | 25 | Declare COI. | Page 20 |
| Funding | 26 | Declare funding sources. | Page 20 |
| Data availability | 27 | State data availability. | Page 20 |
